# Supplementary material
Source: publisher figshare collection journal article supplement (https://sage.figshare.com/ndownloader/files/13904951)
Supplement: Supplementary file 1 [file 13904951]

Comparison of the ESI responses of penicillins with ESI responses of their  
methanolysis products - **supplementary material**

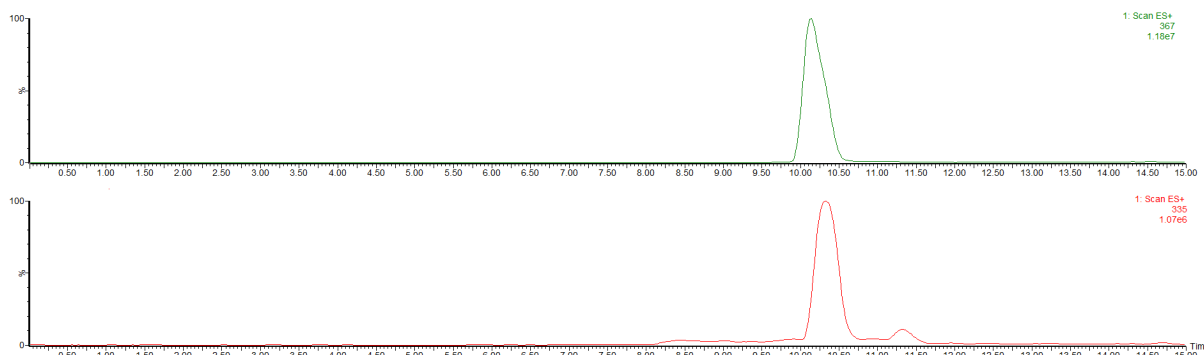

**Figure 1s.** Exemplary single ion chromatograms of  $[\text{Pen}_{\text{methanolized}} + \text{H}]^+$  ( $m/z$  367, top) and  $[\text{Pen} + \text{H}]^+$  ( $m/z$  335, bottom) obtained upon HPLC/ESI-MS analysis. It is clearly seen that penicillin and its methanolysis product are not separated (they overlap). However, even when column of 30 mm long is used, their separation was also poor (Amelin & Avdeeva J. Anal. Chem. 2018; 73: 922-928).

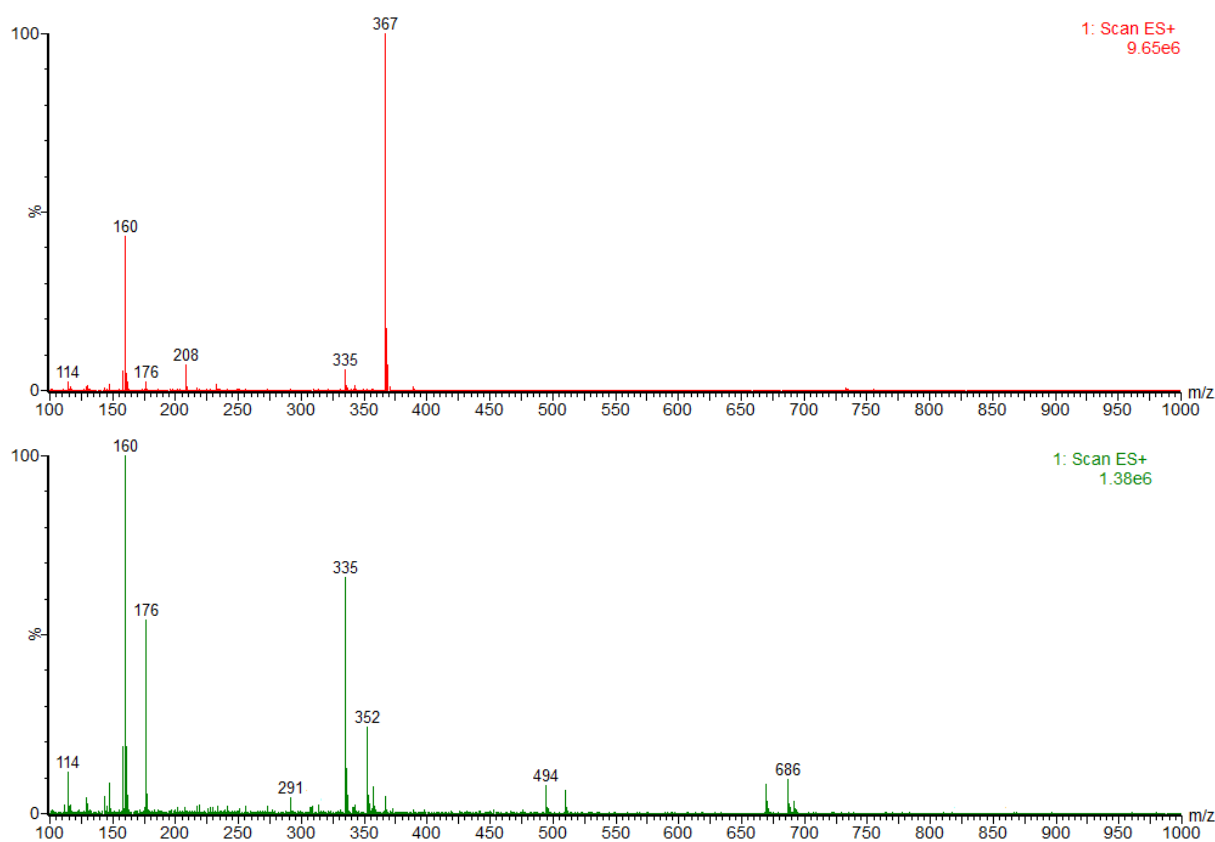

**Figure 2s.** Exemplary full scan mass spectra of penicillin methanolysis product (top) and penicillin (bottom) obtained upon HPLC/ESI-MS analysis.

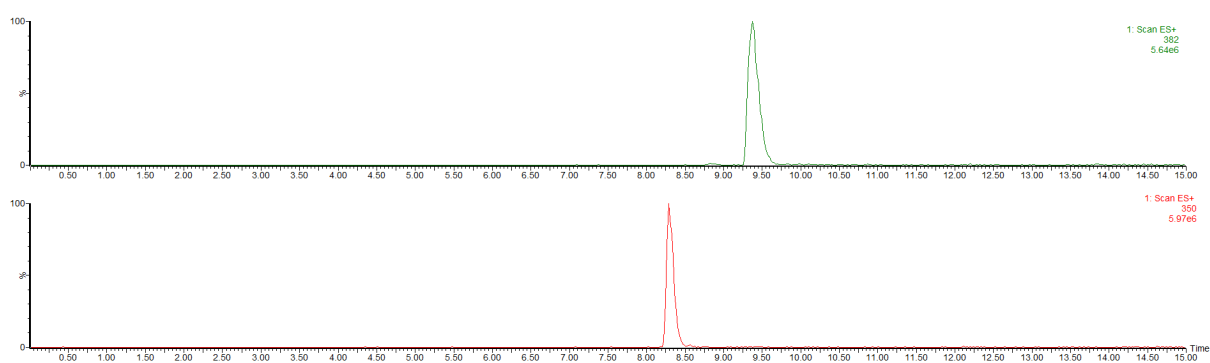

**Figure 3s.** Exemplary single ion chromatograms of  $[\text{Amp}_{\text{methanolized}} + \text{H}]^+$  ( $m/z$  382, top) and  $[\text{Amp} + \text{H}]^+$  ( $m/z$  350, bottom) obtained upon HPLC/ESI-MS analysis.

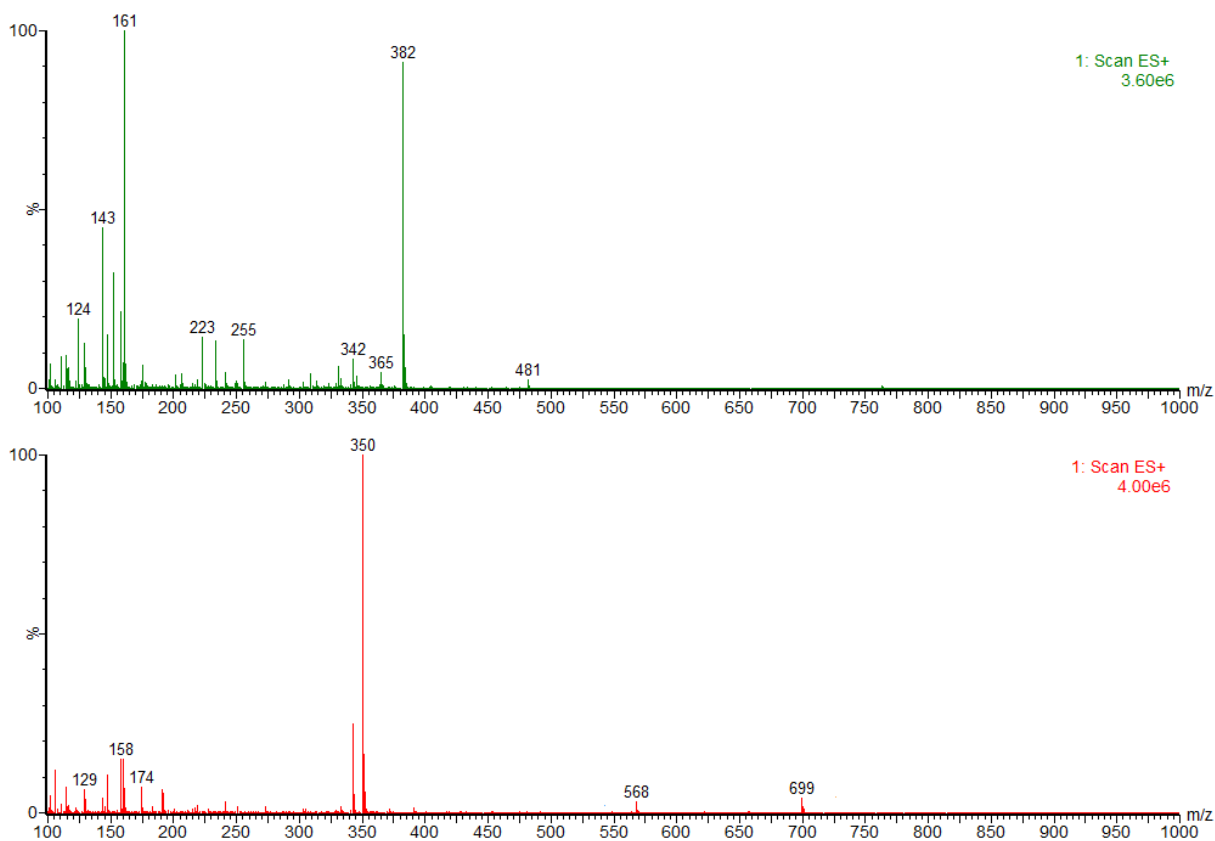

**Figure 4s.** Exemplary full scan mass spectra of ampicillin methanolysis product (top) and ampicillin (bottom) obtained upon HPLC/ESI-MS analysis.

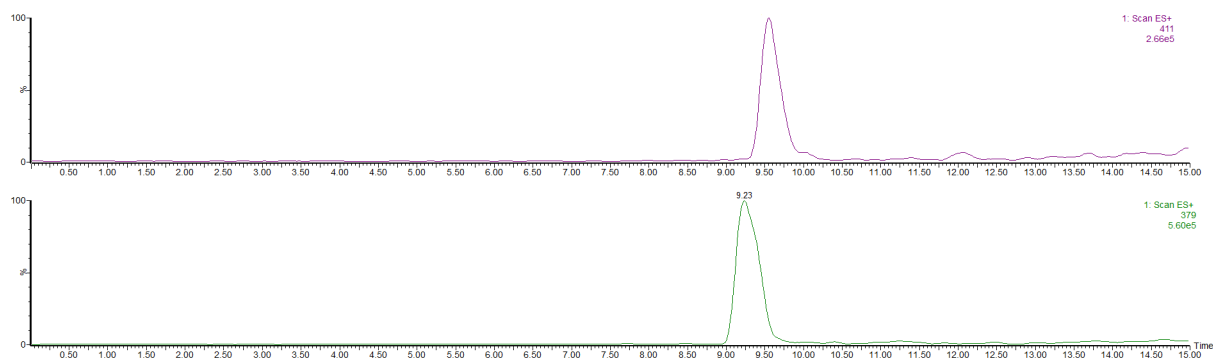

**Figure 5s.** Exemplary single ion chromatograms of  $[\text{Carb}_{\text{methanolized}}+\text{H}]^+$  ( $m/z$  411, top) and  $[\text{Carb}+\text{H}]^+$  ( $m/z$  379, bottom) obtained upon HPLC/ESI-MS analysis.

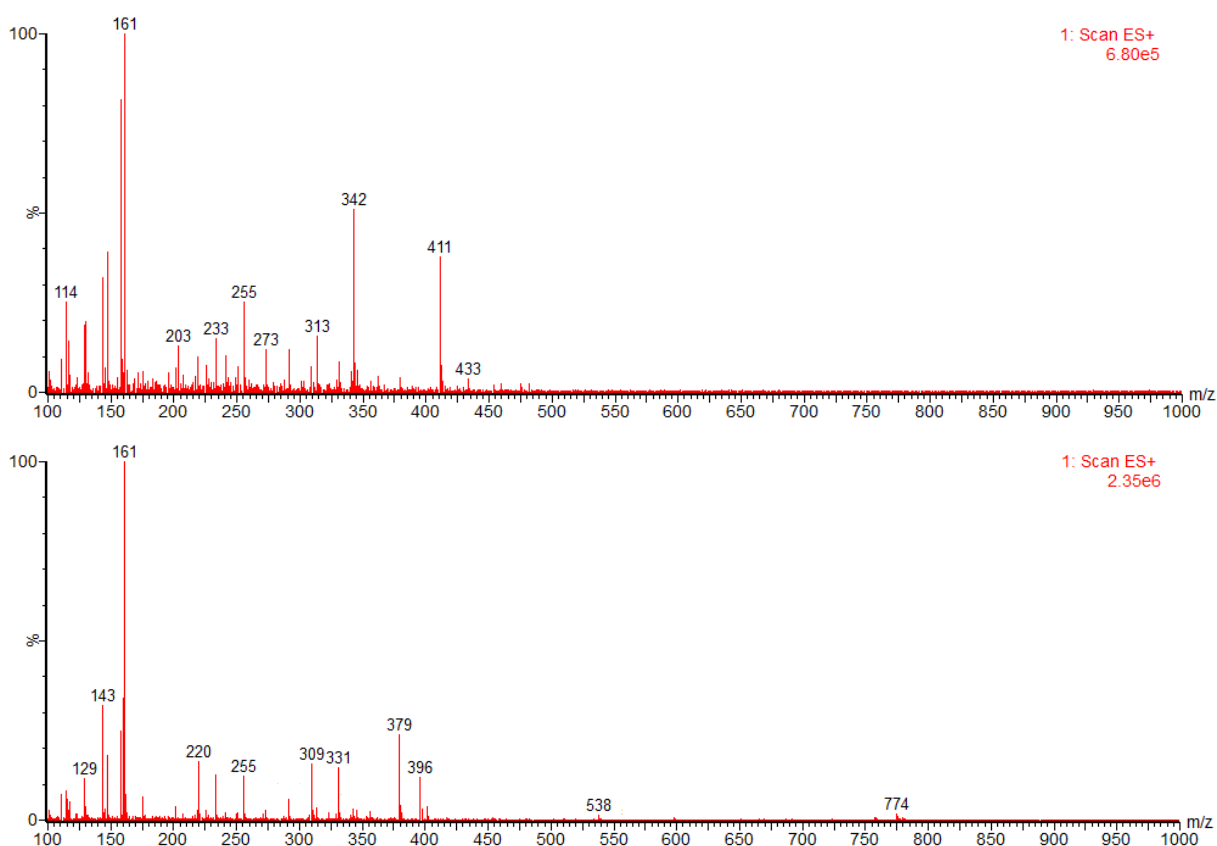

**Figure 6s.** Exemplary full scan mass spectra of carbenicillin methanolysis product (top) and carbenicillin (bottom) obtained upon HPLC/ESI-MS analysis.

The product ion spectra (CID-MS/MS spectra) were taken on a Waters/Micromass (Manchester, UK) Q-tof Premier mass spectrometer (software MassLynx V4.1, Manchester, UK). The sample solutions were infused into the ESI source by a syringe pump at a flow rate of 5  $\mu$ L/min. The electrospray voltage was 2.7 kV and the cone voltage - 30 V. The source temperature was 80°C and the desolvation temperature was 250°C. Nitrogen was used as the cone gas and desolvating gas at the flow-rates of 50 and 400 L/h, respectively. Argon 5.0 was used as a collision gas at the flow-rate 0.2 ml/min in the T-wave collision cell. This flow rate resulted in the collision cell pressure 0.4 Pa. The most important parameter for CID-MS/MS experiments is collision energy (CE). The applied collision energy (laboratory frame), is indicated in each product ion spectrum shown.

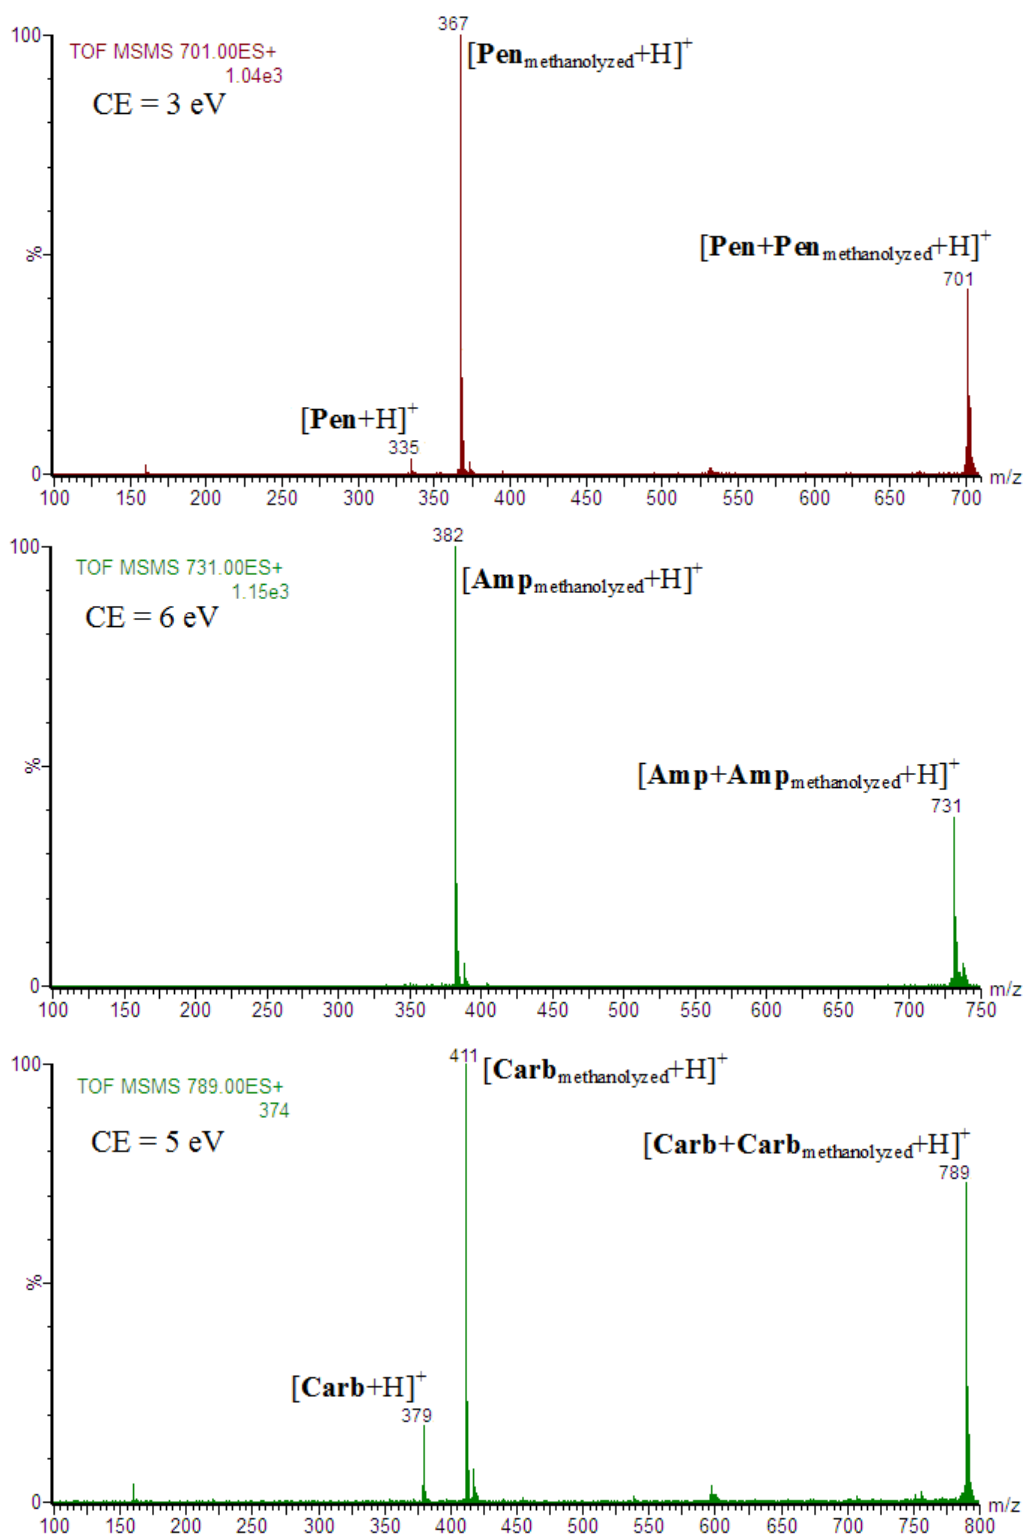

**Figure 7s.** The product ion spectra of adducts  $[\text{Pen} + \text{Pen}_{\text{methanolized}} + \text{H}]^+$ ,  $[\text{Amp} + \text{Amp}_{\text{methanolized}} + \text{H}]^+$  and  $[\text{Carb} + \text{Carb}_{\text{methanolized}} + \text{H}]^+$ . The adducts were characterized by low abundances, however, it was possible to obtain their product ion spectra.

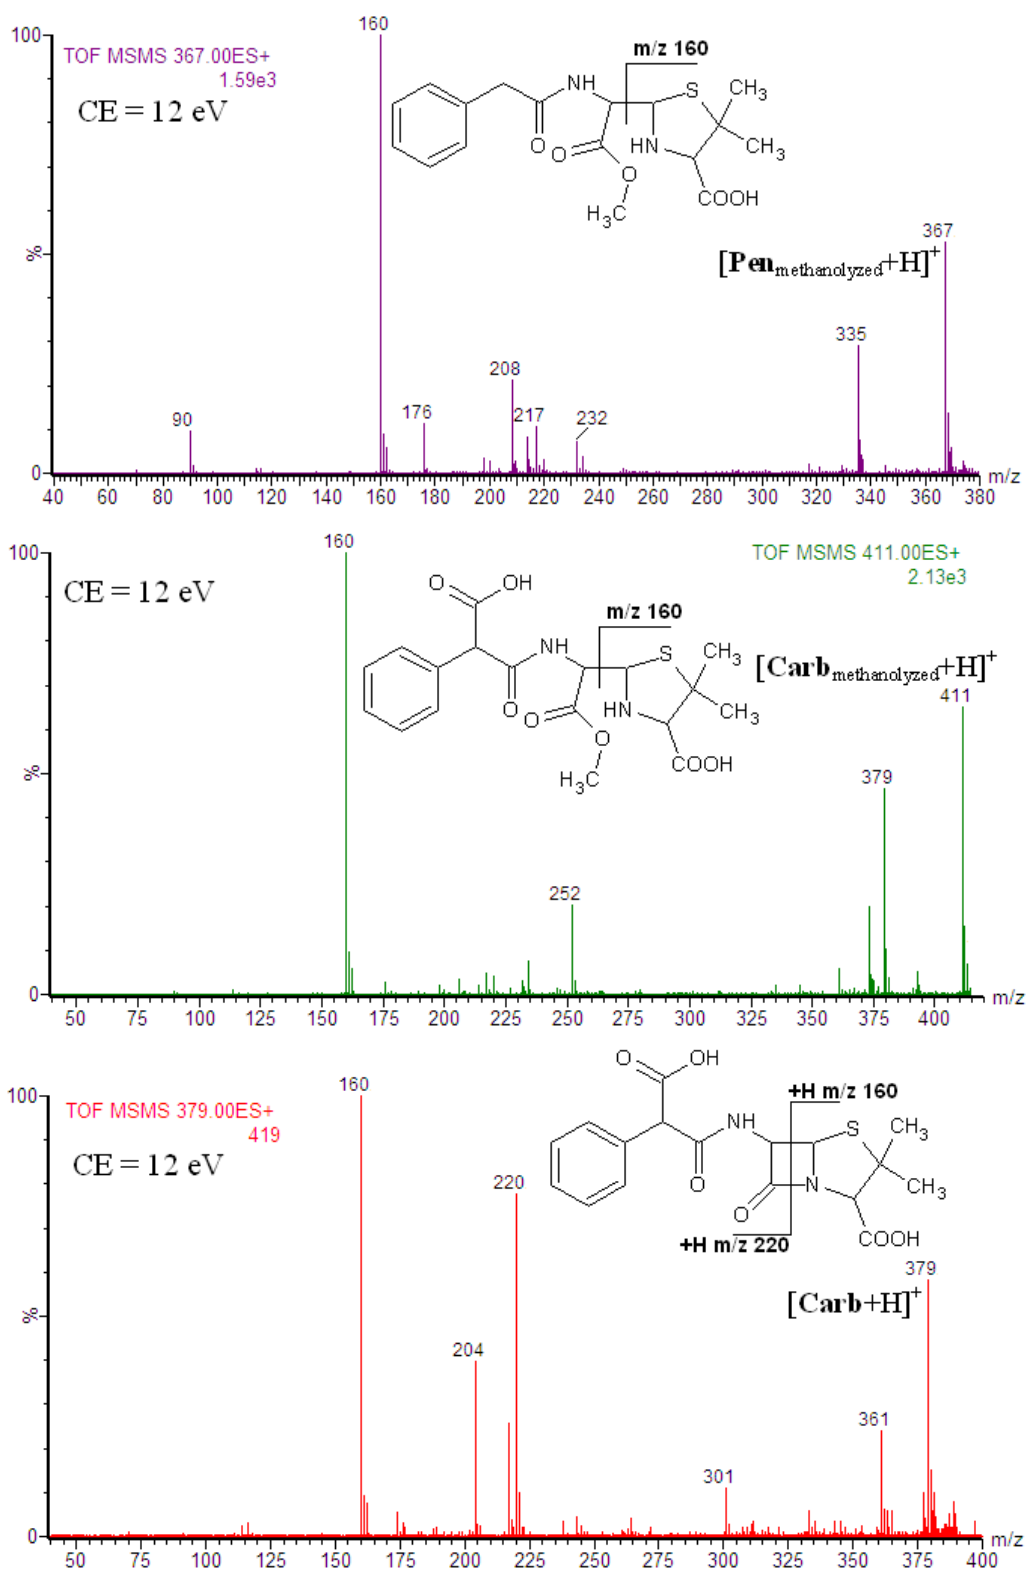

**Figure 8s.** Exemplary product ion spectra (CID MS/MS spectra) of  $[M+H]^+$  ion of methanolyzed penicillin, methanolyzed carbenicillin, carbenicillin and formation of the most abundant fragment ions

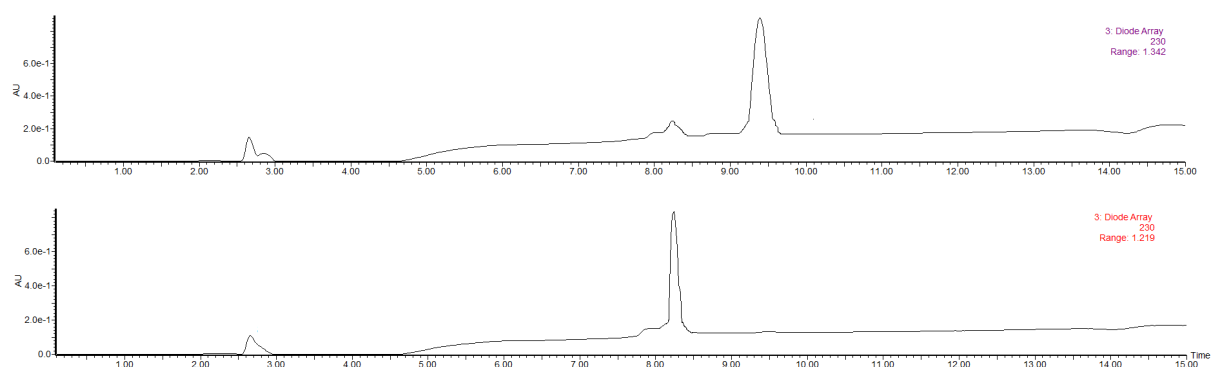

**Figure 9s.** HPLC/UV chromatograms obtained at 230 nm of methanolysed ampicillin (top) and ampicillin. Chromatographic conditions were identical as for HPLC/MS analysis and Waters 996 Photodiode Array Detector was used.

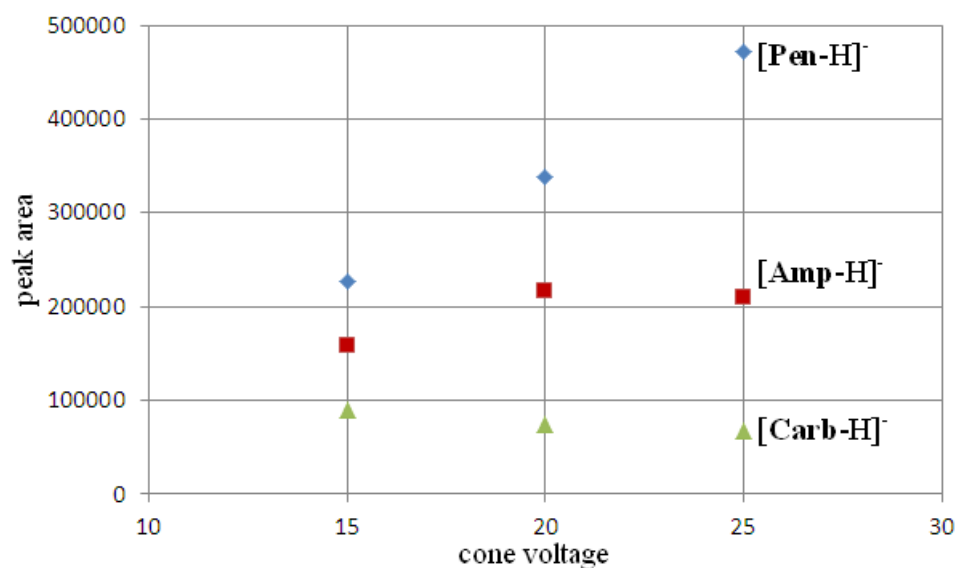

**Figure 10s.** The breakdown plots of the chromatographic peak areas of  $[M-H]^-$  ions against cone voltage. It is a little unexpected that carbenicillin has the lowest ESI response in negative ion mode.



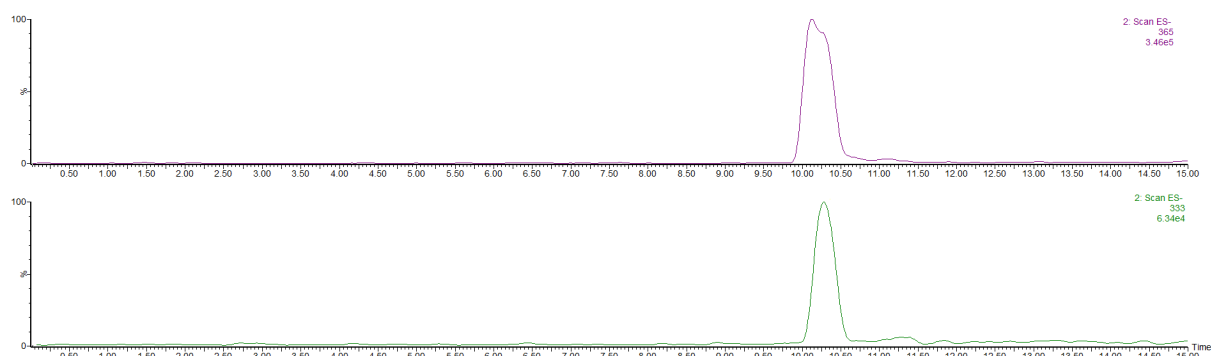

**Figure 11s.** Exemplary single ion chromatograms of  $[\text{Pen}_{\text{methanolized}}\text{-H}]^-$  ( $m/z$  365, top) and  $[\text{Pen-H}]^-$  ( $m/z$  333, bottom) obtained upon HPLC/ESI-MS analysis in negative ion mode.

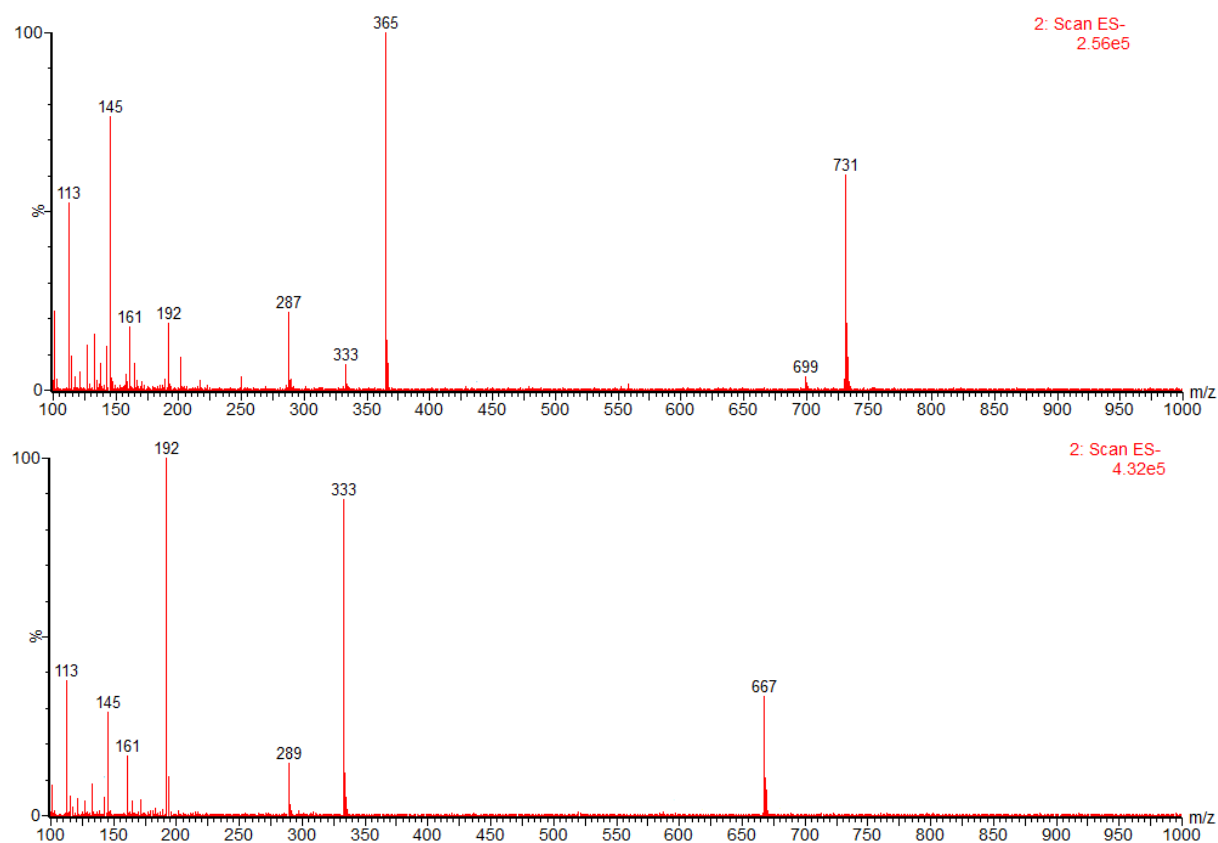

**Figure 12s.** Exemplary full scan mass spectra of penicillin methanolysis product (top) and penicillin (bottom) obtained upon HPLC/ESI-MS analysis in negative ion mode.

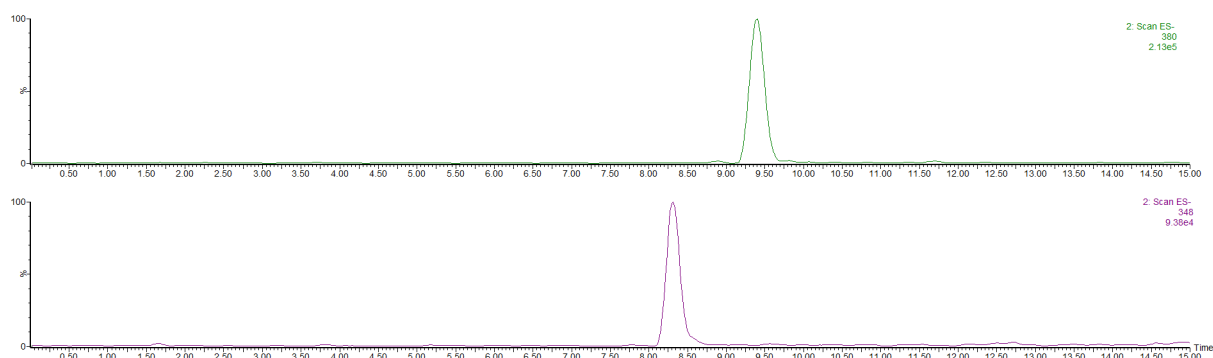

**Figure 13s.** Exemplary single ion chromatograms of  $[\text{Amp}_{\text{methanolized}}\text{-H}]^-$  ( $m/z$  380, top) and  $[\text{Amp}\text{-H}]^-$  ( $m/z$  348, bottom) obtained upon HPLC/ESI-MS analysis in negative ion mode.

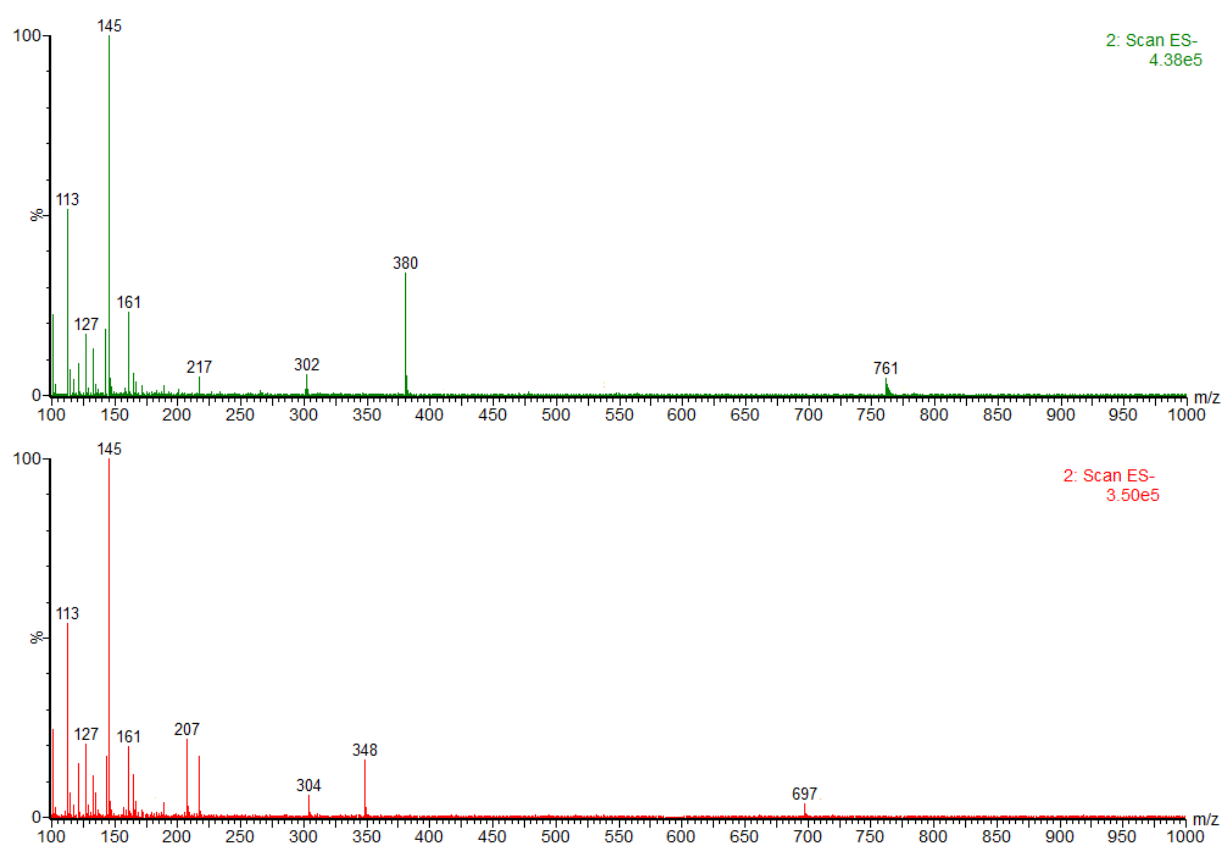

**Figure 14s.** Exemplary full scan mass spectra of ampicillin methanolysis product (top) and ampicillin (bottom) obtained upon HPLC/ESI-MS analysis in negative ion mode.

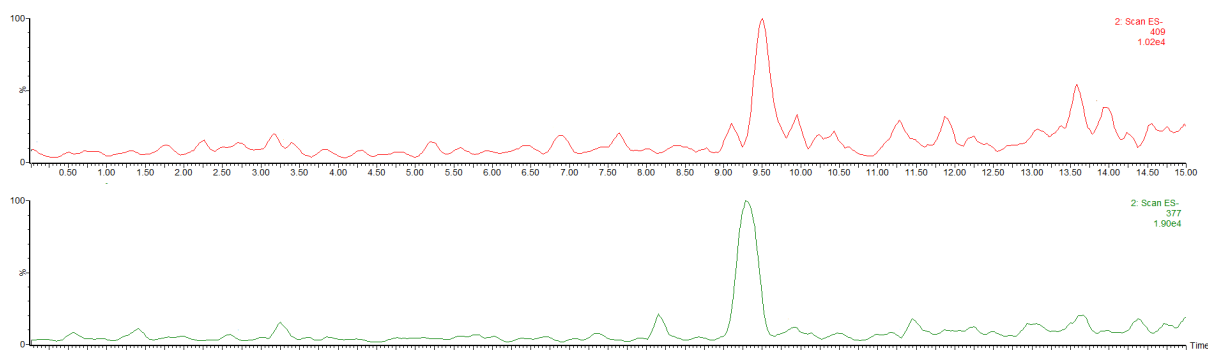

**Figure 15s.** Exemplary single ion chromatograms of  $[\text{Carb}_{\text{methanolized}}\text{-H}]^-$  (m/z 409, top) and  $[\text{Carb-H}]^-$  (m/z 377, bottom) obtained upon HPLC/ESI-MS analysis in negative ion mode.

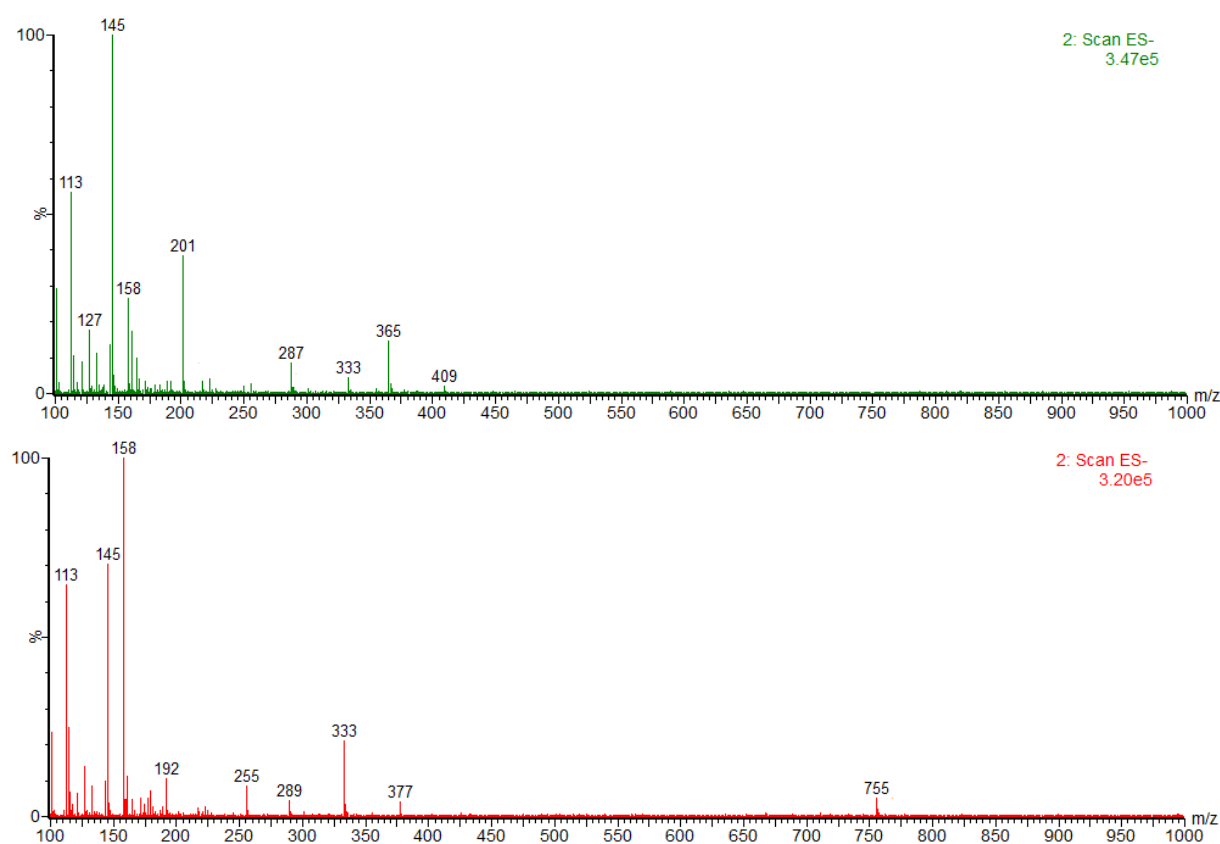

**Figure 16s.** Exemplary full scan mass spectra of carbenicillin methanolysis product (top) and carbenicillin (bottom) obtained upon HPLC/ESI-MS analysis in negative ion mode. The abundant fragment ions formed as a result of the loss of  $\text{CO}_2$  molecules from  $[\text{M-H}]^-$  ions are observed (m/z 365 for carbenicillin methanolysis product and m/z 333 for carbenicillin). Product ion spectra of  $[\text{M-H}]^-$  ions confirm that the gas phase decomposition of  $[\text{Carb}_{\text{methanolized}}\text{-H}]^-$  and  $[\text{Carb-H}]^-$  occurs very easy (Figure 19s).

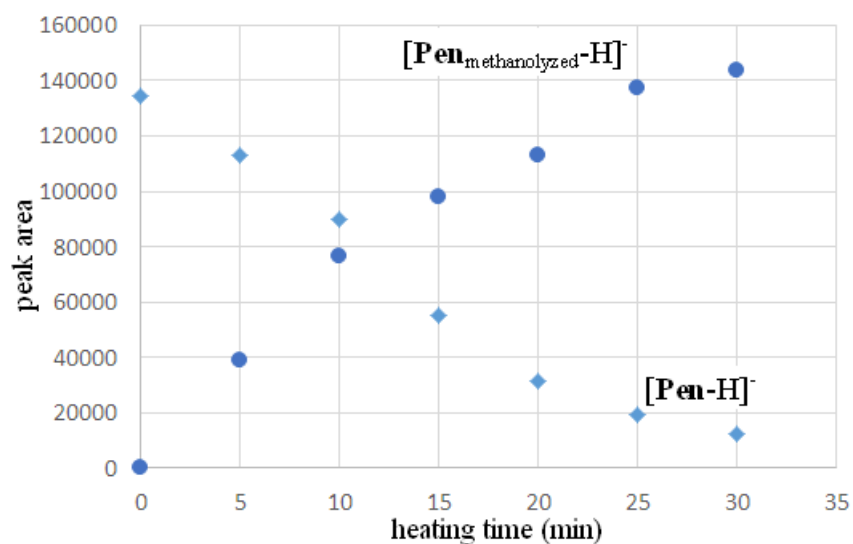

**Figure 17s.** The breakdown plots of the ESI response of ions [Pen-H]<sup>-</sup> (m/z 333) and [Pen<sub>methanolized</sub>-H]<sup>-</sup> (m/z 365) against heating time. Methanolized penicillin almost identical ESI response as penicillin.

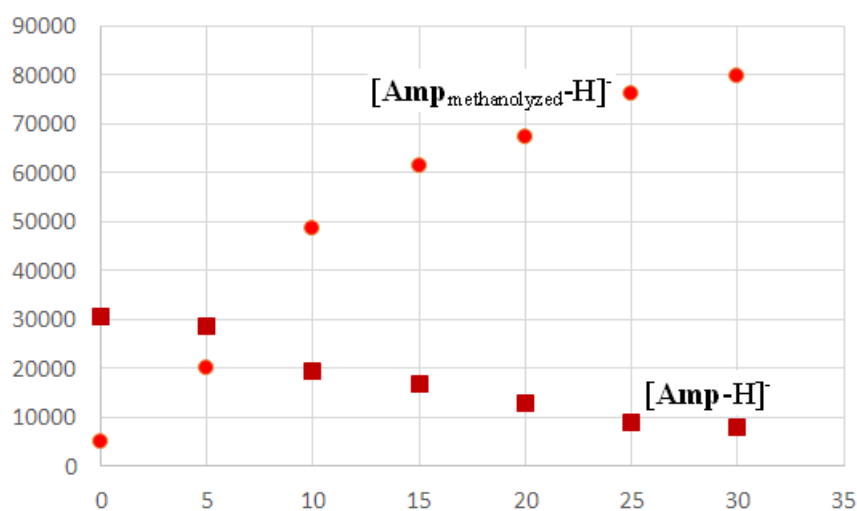

**Figure 18s.** The breakdown plots of the ESI response of ions [Amp-H]<sup>-</sup> (m/z 348) and [Amp<sub>methanolized</sub>-H]<sup>-</sup> (m/z 38) against heating time. Methanolised ampicillin has almost three times higher ESI response than ampicillin.

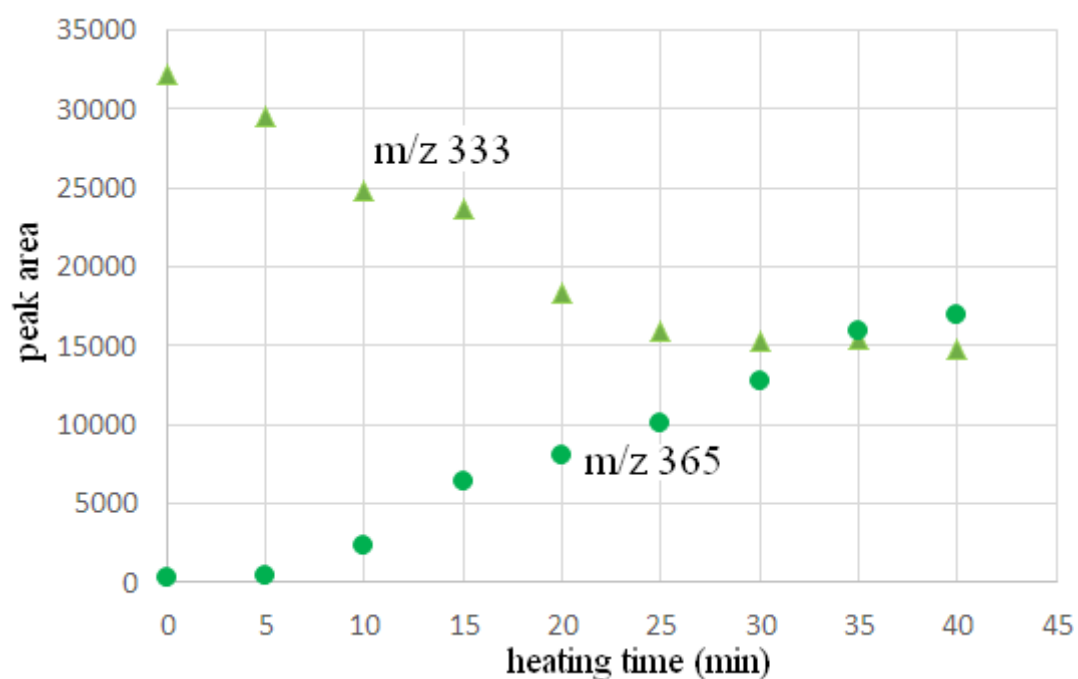

**Figure 19s.** The breakdown plots of the ESI response of ions [**Carb**-H-CO<sub>2</sub>]<sup>-</sup> (m/z 333), [**Carb**<sub>methanolized</sub>-H-CO<sub>2</sub>] (m/z 365) against heating time (fragment ions formed as a result of the CO<sub>2</sub> loss are more abundant than deprotonated molecules (**Figure 14s**)). Methanolized carbenicillin has lower ESI response than carbenicillin.

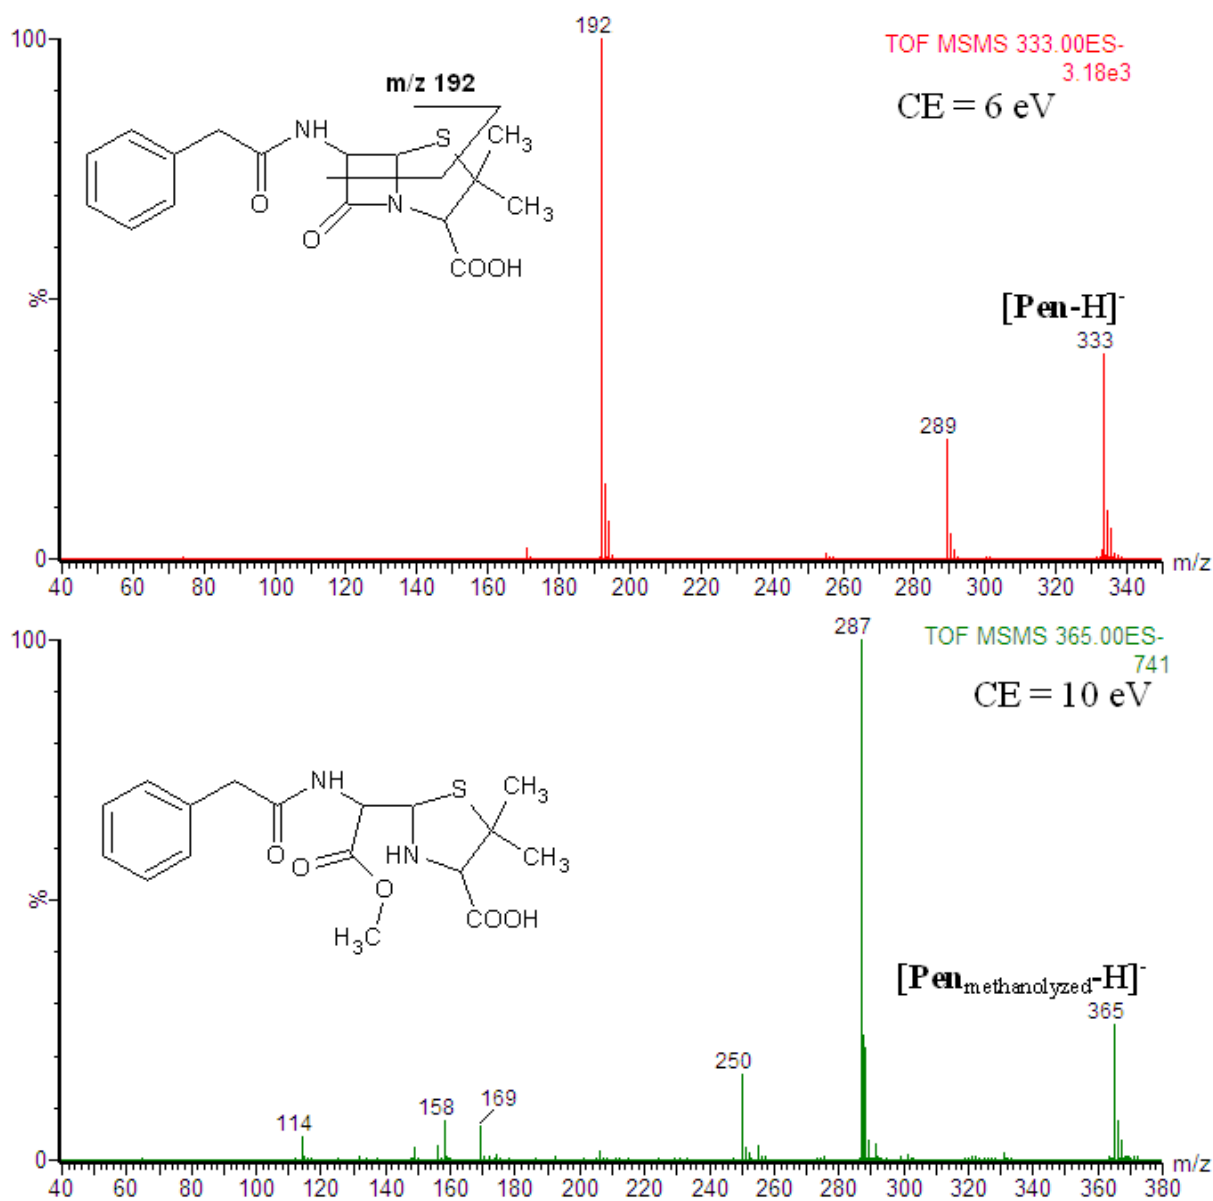

**Figure 20s.** Exemplary product ion spectra (CID MS/MS spectra) of [M-H]<sup>-</sup> ion of penicillin and methanolyzed penicillin.

Breaking of three bonds of bicyclic system (m/z 192) has been already observed for ampicillin and amoxicillin (Ghauch, et al. Environ. Pollut. 2009, 157, 1626-1635; Xi et al. Anal. Lett. 2012, 45, 1764-1776; Frański et al. Rapid Commun Mass Spectrom. 2014, 28, 713-722).

Fragment ion at m/z 287 is formed as a result of the loss of CO<sub>2</sub> and H<sub>2</sub>S molecules from [Pen<sub>methanolyzed</sub>-H]<sup>-</sup> ion, analogous processes have been observed for methanolyzed ampicillin and amoxicillin (Frański et al. Rapid Commun Mass Spectrom. 2014, 28, 713-722).

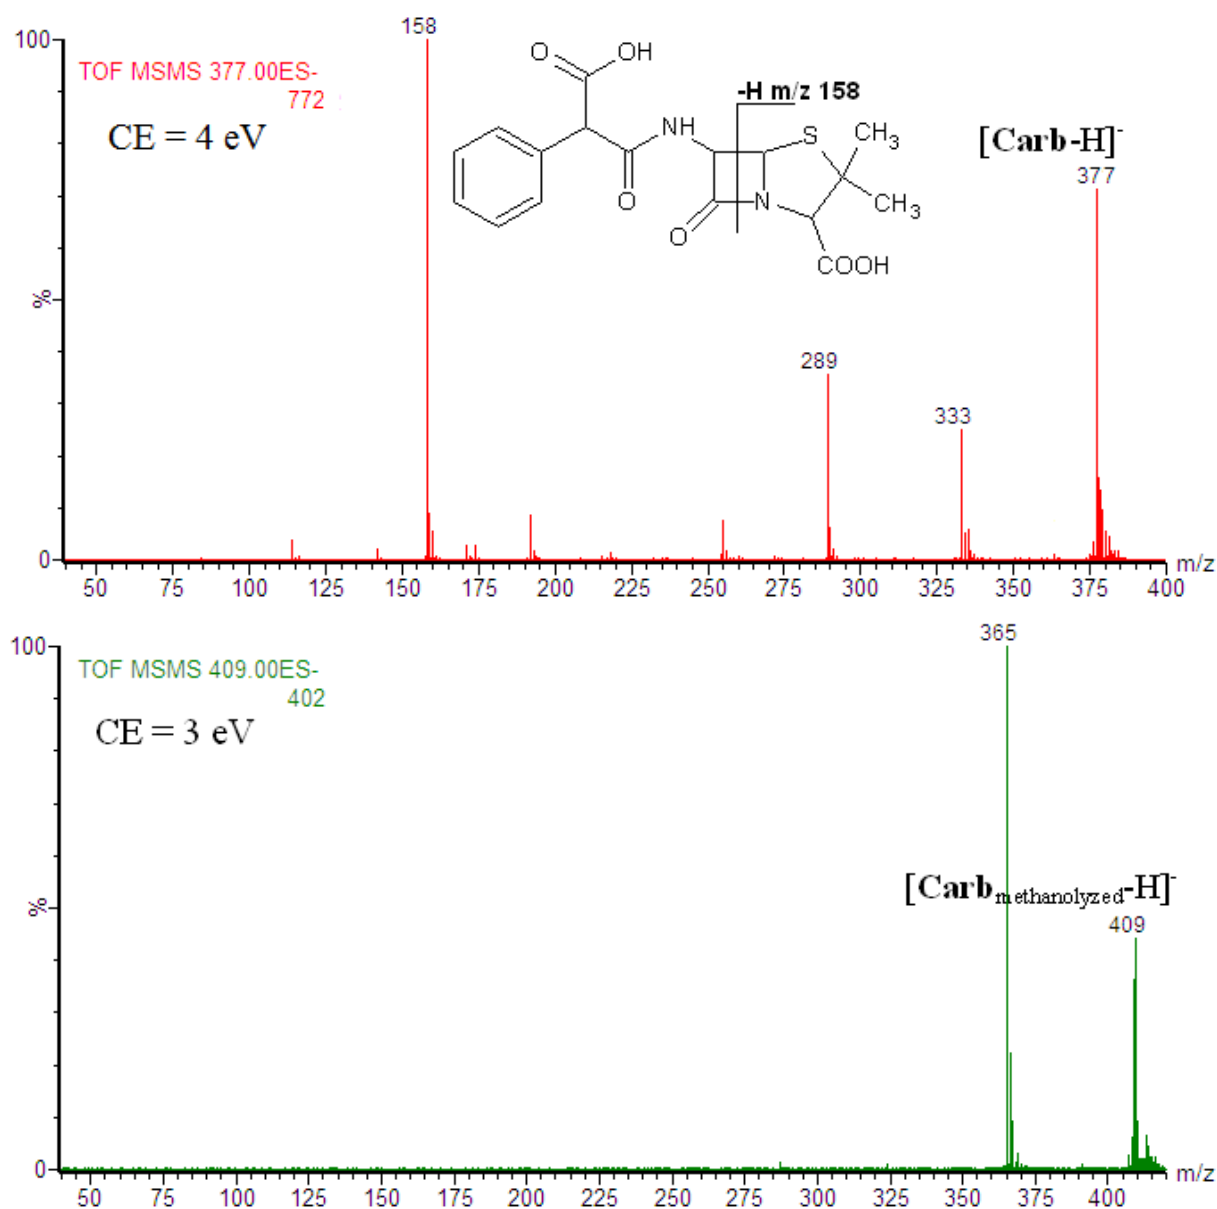

**Figure 21s.** Exemplary product ion spectra (CID MS/MS spectra) of  $[M-H]^-$  ions of penicillin and methanolyzed penicillin. Abundant fragment ions are observed at low collision energy.
